# Supplementary material for: Identification of Immunoreactive Peptides of Toxins to Simultaneously Assess the Neutralization Potency of Antivenoms against Neurotoxicity and Cytotoxicity of Naja atra Venom
Source: PubMed Central journal article supplement (PMC5793097; doi:10.3390/toxins10010010), 2017-12-25
Supplement: toxins-10-00010-s001.pdf [file toxins-10-00010-s001.pdf]

# Supplementary Materials: Identification of Immunoreactive Peptides of Toxins to Simultaneously Assess the Neutralization Potency of Antivenoms against Neurotoxicity and Cytotoxicity of *Naja atra* Venom

Bing-Sin Liu, Wen-Guey Wu, Min-Han Lin, Chi-Han Li, Bo-Rong Jiang, Suh-Chin Wu, Chih-Hsiang Leng and Wang-Chou Sung

**Table S1.** Identification of *N. atra* venom components within the HPLC chromatographic fractions using LC-MS/MS.

| <sup>a</sup> Peak | Protein identity                                         | <sup>b</sup> AC no. | Significant peptide                                                                                                                                                      | Ion, m/z                                                                                                                                      | MS score | Toxin family     | <sup>c</sup> Toxicity score |
|-------------------|----------------------------------------------------------|---------------------|--------------------------------------------------------------------------------------------------------------------------------------------------------------------------|-----------------------------------------------------------------------------------------------------------------------------------------------|----------|------------------|-----------------------------|
| 1                 | Cobrotoxin<br>-                                          | P60770              | K.NGIEINCCTTDR.C<br>R.GCGCPSVK.N                                                                                                                                         | 726.7767 (2+)<br>432.6666 (2+)                                                                                                                | 88       | 3FTX             | 60.3                        |
| 2                 | Cobrotoxin-b                                             | P80958              | K.VKPGVNLNCCTTDR.C<br>K.TCSGETNCYK.K<br>K.TCSGETNCYKK.W                                                                                                                  | 545.2432 (3+)<br>610.2364 (2+)<br>674.2805 (2+)                                                                                               | 170      | 3FTX             | 5.0                         |
| 3                 | Phospholipase A <sub>2</sub>                             | P00598              | R.SWWDFAFYGICYGGR.G<br>R.LAAICFAGAPYNNNNYNID<br>LK.AR.CCQVHDNCYNEAEK.I<br>K.TYSYEQSGLTCK.G<br>K.GGNNACAAAVCDCDR.L<br>K.NMIQCTVPSR.S<br>R.GGSGTPVDDLDR.C<br>K.ISGCWPYFK.T | 921.8533 (2+)<br>1178.5278 (2+)<br><br>609.5383 (2+)<br>849.3058 (2+)<br>805.7562 (2+)<br><br>603.2667 (2+)<br>594.7442 (2+)<br>579.2611 (2+) | 859      | PLA <sub>2</sub> | N.D.                        |
| 4                 | Cardiotoxin A5                                           | P62375              | K.CHNTQLPFIYK.T<br>K.YVCCSTDKCN.-<br>R.GCADNCPK.N<br>K.FPLKFPVK.R<br>K.YVCCSTDK.C                                                                                        | 710.8403 (2+)<br>653.7474 (2+)<br>461.1946 (2+)<br>488.3006 (2+)<br>516.6811 (2+)                                                             | 163      | 3FTX             |                             |
| 5                 | Cardiotoxin A1                                           | P60304              | K.MFMMSDLTIPVK.R<br>K.LIPIASK.T<br>R.GCIDVCPK.N<br>K.YVCCNTDR.C<br>K.RGCIDVCPK.N<br>K.MFMMSDLTIPVKR.G                                                                    | 706.8523 (2+)<br>371.2426 (2+)<br>474.6818 (2+)<br>544.2131 (2+)<br>552.7282 (2+)<br>523.5909 (3+)                                            | 308      | 3FTX             | 25.95                       |
| 6                 | Cardiotoxin A3                                           | P60301              | K.LVPLFYK.T<br>K.MFMVATPK.V<br>K.MFMVATPK.V                                                                                                                              | 440.2615 (2+)<br>462.7289 (2+)<br>478.7285 (2+)                                                                                               | 274      | 3FTX             |                             |
| 7                 | Cardiotoxin A6                                           | P80245              | K.MFMVAAPK.V<br>K.CNQLIPPYK.A                                                                                                                                            | 447.7211 (2+)<br>640.3278 (2+)                                                                                                                | 284      | 3FTX             |                             |
| 8                 | Cysteine-rich secretory protein                          | Q7T1K6              | R.WANTCSLNHSPDNL.R.V<br>R.AGCAVSYCPSSAWSYFYVCQ<br>YCPSGNFQGK.T<br>R.VSPTASNMLK.M<br>K.LTNCDSLK.Q<br>K.EIVDLHNSLR.R<br>K.SNCPASCFCR.N<br>K.QSSCQDDWIK.S                   | 595.5896 (3+)<br>1167.8121 (3+)<br><br>524.2760 (2+)<br>532.2622 (2+)<br>598.3191 (2+)<br>629.7216 (2+)<br>633.7682 (2+)                      | 223      | CRISP            | N.D.                        |
| 9                 | Zinc metalloproteinase-disintegrin-like kaouthiagin-like | D3TTC1              | R.VAKDDCDLPELCTGQSAECP<br>TDSLQR.N<br>R.NDNAQLLTGIDFNGNTVGR.<br>A<br>K.FEVKPAASVTLK.S<br>R.TAPAFQFSSCSIR.E<br>K.DKFEVKPAASVTLK.S                                         | 989.0843 (3+)<br><br>1009.9933 (2+)<br><br>430.5788 (3+)<br>736.3360 (2+)<br>511.6191 (3+)                                                    | 192      | SVMP             | N.D.                        |

|    |                                                 |        |                                                                                                                                                                                                           |               |     |      |      |
|----|-------------------------------------------------|--------|-----------------------------------------------------------------------------------------------------------------------------------------------------------------------------------------------------------|---------------|-----|------|------|
|    |                                                 |        | K.ASCICIPGPCIMLK.K                                                                                                                                                                                        | 810.3913 (2+) |     |      |      |
| 10 | Zinc metalloproteinase-disintegrin-like atragin | D3TTC2 | R.AAKDDCDLPELCTGQSAECP<br>TDVFQR.N<br>K.TSAAVVQDYSSR.T<br>R.KIPCAA.K.D<br>R.GFCTCGFNK.C<br>R.DSCFTLNQR.T<br>R.ATLNLFGEWR.E<br>R.TKPAYQFSSCSVR.E<br>K.LQHEAQCDSEECCEK.C<br>K.DDCDLPELCTGQSAECPD.V<br>FOR.N | 995.0845 (3+) | 281 | SVMP | N.D. |

<sup>a</sup> The peak refers to the peak number highlighted in Figure S1. <sup>b</sup> AC is the abbreviation of accession number in Uniprot database. <sup>c</sup> Toxicity score was calculated according to Laustsen, A et al. [25] by the ratio of protein abundance (%) estimated from the reverse phase HPLC chromatography to its medium lethal dose (LD<sub>50</sub>). The toxicity score of the crude venom, which abundance was defined as 100%, was 149.3. N.D. represented LD<sub>50</sub> was undetectable at a cut-off value of 50 µg per mouse. Abbreviations: SVMP indicates snake venom metalloproteinase. CRISP is cysteine-rich secretory protein. 3FTX means three finger toxins.

**Table S2.** List of synthetic peptides used for the immunoreactive peptide mapping study.

| Index                  | Peptide sequence |
|------------------------|------------------|
| CTXA3 <sub>1-15</sub>  | LKCNKLVPLFYKTCP  |
| CTXA3 <sub>5-19</sub>  | KLVPLFYKTCPAGKN  |
| CTXA3 <sub>11-25</sub> | YKTCPAGKNLCYKMF  |
| CTXA3 <sub>15-29</sub> | PAGKNLCYKMFVAT   |
| CTXA3 <sub>21-35</sub> | CYKMFVATPKVPVK   |
| CTXA3 <sub>26-40</sub> | MVATPKVPVKRGCID  |
| CTXA3 <sub>31-45</sub> | KVPVKRGCIDVCPKS  |
| CTXA3 <sub>36-50</sub> | RGCIDVCPKSSLLVK  |
| CTXA3 <sub>43-57</sub> | PKSSLLVKYVCCNTD  |
| CTXA3 <sub>46-60</sub> | SLLVKYVCCNTDRCN  |
| sNTX <sub>1-15</sub>   | LECHNQSSQTPPTT   |
| sNTX <sub>4-18</sub>   | HNQQSSQTPPTTGCS  |
| sNTX <sub>11-25</sub>  | TPTTTGCSGGETNCY  |
| sNTX <sub>16-30</sub>  | GCSGGETNCYKKRWR  |
| sNTX <sub>21-35</sub>  | ETNCYKKRWRDHRGY  |
| sNTX <sub>26-40</sub>  | KKRWRDHRGYRTERG  |
| sNTX <sub>31-45</sub>  | DHRGYRTERGCGCPS  |
| sNTX <sub>36-50</sub>  | RTERGCGCPSVKNGI  |
| sNTX <sub>39-53</sub>  | RGCGCPSVKNGIEIN  |
| sNTX <sub>45-59</sub>  | SVKNGIEINCCTDR   |
| sNTX <sub>48-62</sub>  | NGIEINCCTDRCNN   |
| <sup>a</sup> TFF       | TFFLTQGALLNDK    |
| <sup>b</sup> GIL       | GILGFVFTLTPSER   |

<sup>a</sup> TFF is the abbreviation of TFFLTQGALLNDK which is a partial sequence of neuraminidase of H1N1 influenza virus. <sup>b</sup> GIL is the abbreviation of GILGFVFTLTPSER which is a partial sequence of M1 protein of H5N1 influenza virus.

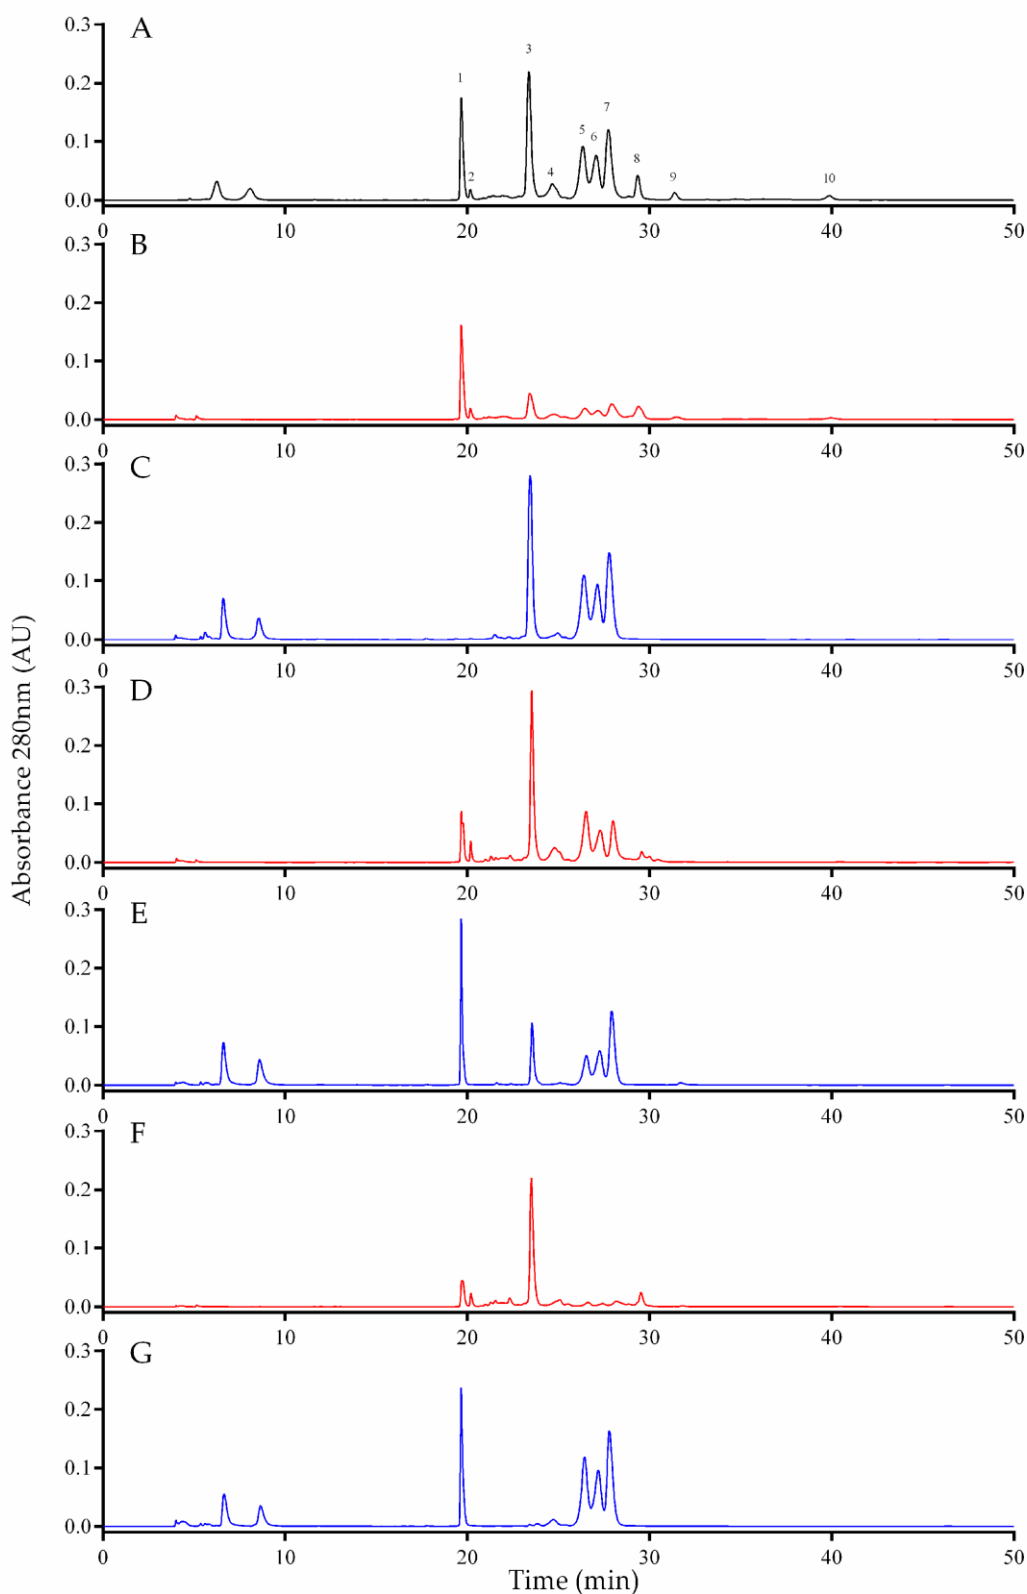

**Figure S1.** Evaluation of antivenom efficacy in capturing *N. atra* venom components. (A) HPLC chromatogram of 500  $\mu$ g of *N. atra* crude venom. The component within the chromatographic peaks (no.1-10) were identified using LC MS/MS (Table S1). The elution (Elu) and flow through (FT) fractions of (B,C) BAV-, (D,E) SAV-Naja-, and (F,G) NPAV-immobilized affinity columns were collected and analyzed by reverse phase HPLC to determine the retained percentage of venom components.

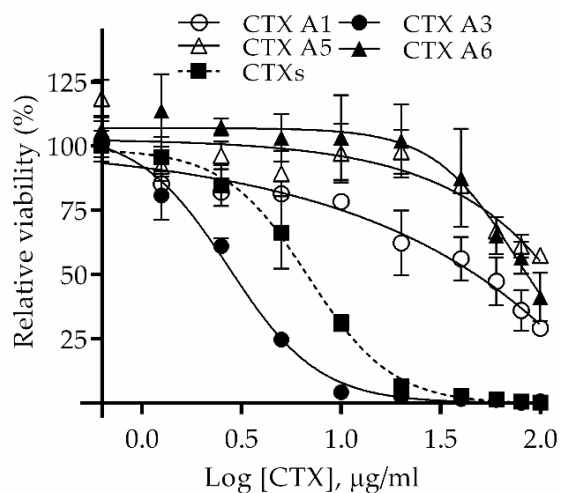

**Figure S2.** Analyzing the cytotoxicity of CTX analogs of *N. atra* venom using the cell-based assay.

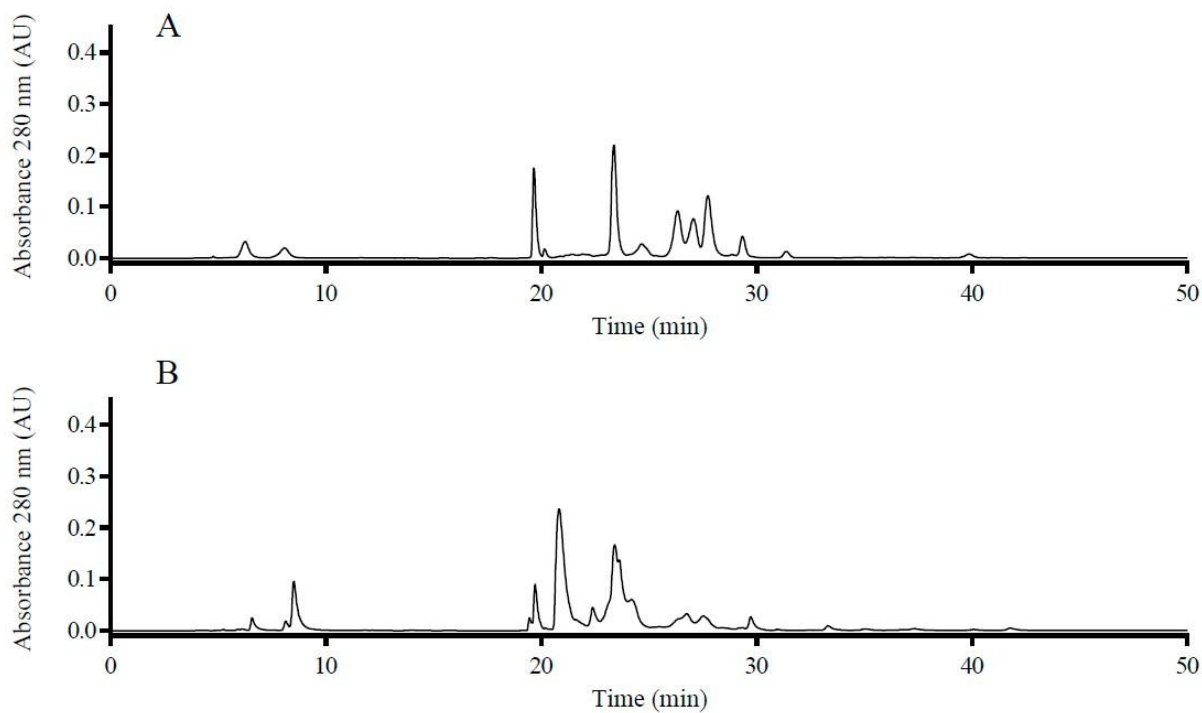

**Figure S3.** Reverse phase HPLC chromatograms of 300 µg of (A) *N. atra* and (B) *N. kaouthia* venom used in this study.
